# Supplementary material
Source: PubMed Central journal article supplement (PMC6503985)
Supplement: develop-146-168153-s1.pdf [file develop-146-168153-s1.pdf]

A

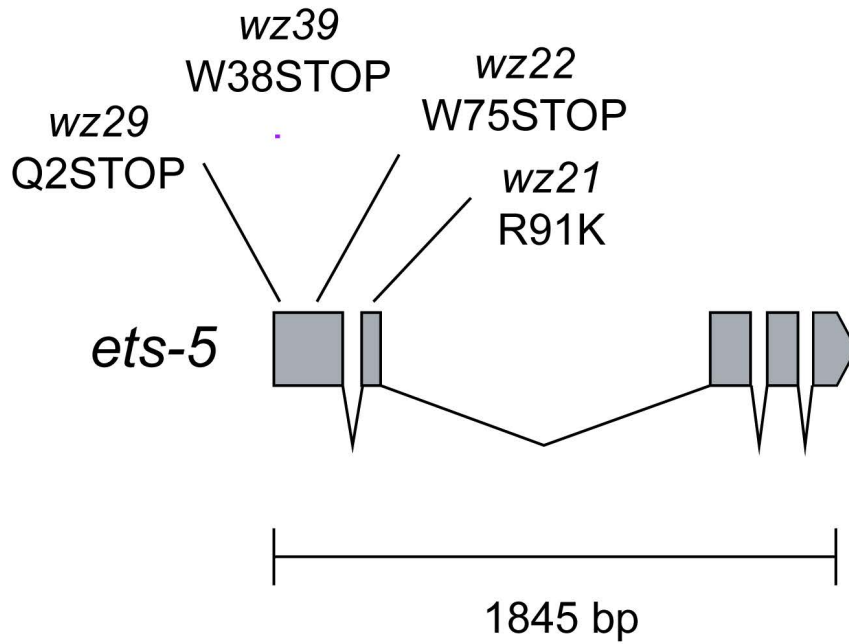

B

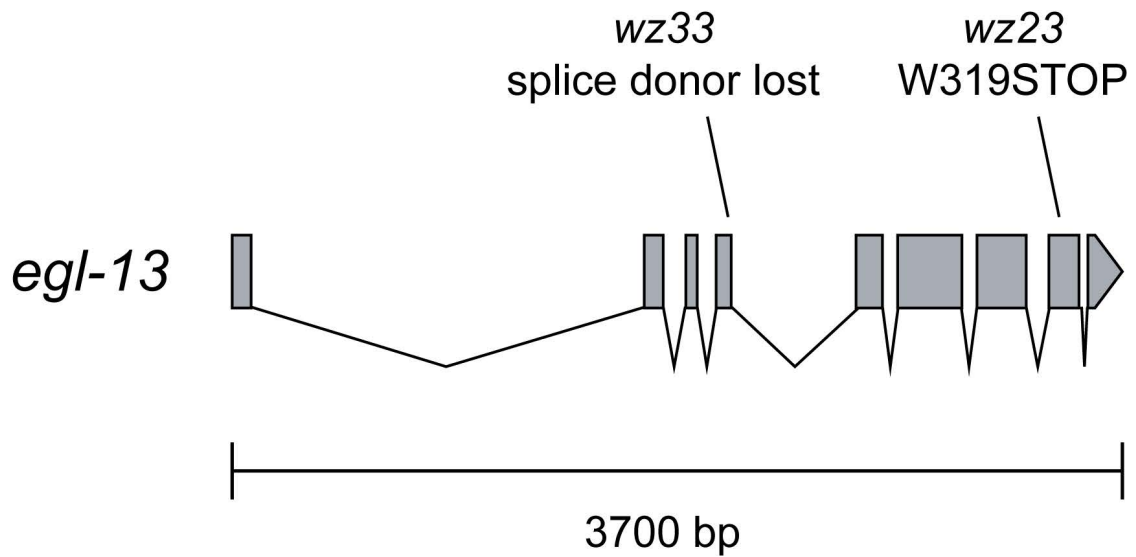

**Figure S1. Alleles of *ets-5* and *egl-13* isolated by a screen for mutants with defective expression of a BAG fate marker.**

A. Alleles of *ets-5* recovered from a screen for mutants with defective expression of the BAG fate marker  $P_{flp-17}::gfp$ .

B. Alleles of *egl-13* recovered from the same screen.

A

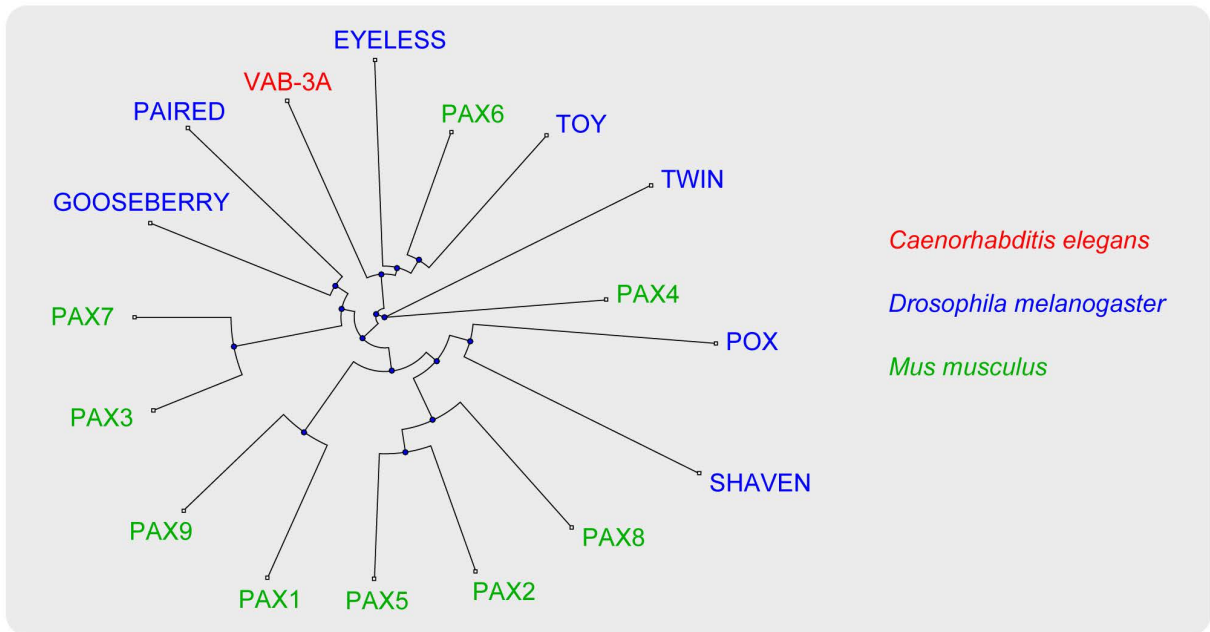

B

wz25  
↓

|               |                                                                                                             |
|---------------|-------------------------------------------------------------------------------------------------------------|
| Dm POX        | TGQAGVNQLGGVFNVGRPLPDCVRRRIVDLALCGVRPCDISRQLLVSHGCVSKILTRFYETGSIRPGSIGGSKTKQVATPTVVKKIIRLKEENSGMFAWEIREQLQ  |
| Mm PAX1       | QTYGEVNVQLGGVFNVGRPLPNAIRLRIVELAQLGIRPCDISRQLRVSHGCVSKILARYNETGSILPGAIGGSKPR-VTTPNVVKHIRDYKQGDPGIFAWIIRDRL  |
| Mm PAX9       | PAFGEVNVQLGGVFNVGRPLPNAIRLRIVELAQLGIRPCDISRQLRVSHGCVSKILARYNETGSILPGAIGGSKPR-VTTPNVVKHIRDYKQRDPGIFAWIIRDRL  |
| Dm SHAVEN     | DGHGGVNVQLGGVFNVGRPLPDVVRQRIVELAHNGVRPCDISRQLRVSHGCVSKILSRYYETGSFKAGVIGGSKPK-VATPPVVDIAIANYKRENPTMFAWEIRDRL |
| Mm PAX8       | SGHGGLNVQLGGAFVNGRPLPEVVRQRIVDLAHQGVRPCDISRQLRVSHGCVSKILGRYYETGSIRPGVIGGSKPK-VATPKVVEKIGDYKQNPMTMFAWEIRDRL  |
| Mm PAX2       | HRHGGVNVQLGGVFNVGRPLPDVVRQRIVELAHQGVRPCDISRQLRVSHGCVSKILGRYYETGSIKPGVIGGSKPK-VATPKVVDKIAEYKQNPMTMFAWEIRAQL  |
| Mm PAX5       | TGHGGVNVQLGGVFNVGRPLPDVVRQRIVELAHQGVRPCDISRQLRVSHGCVSKILGRYYETGSIKPGVIGGSKPK-VATPKVVEKIAEYKQNPMTMFAWEIRDRL  |
| Mm PAX3       | LQGGRVNVQLGGVFINGRPLPNHIRHKIVEMAHHGIRPCVSRQLRVSHGCVSKILCRYQETGSIRPGAIGGSKPKQVTTDPVVEKKIEEYKRENPGMFSWEIRDRL  |
| Mm PAX7       | LQGGRVNVQLGGVFINGRPLPNHIRHKIVEMAHHGIRPCVSRQLRVSHGCVSKILCRYQETGSIRPGAIGGSKPRQVATPDVEKKIEEYKRENPGMFSWEIRDRL   |
| Dm GOOSEBERRY | QQQGRVNVQLGGVFINGRPLPNHIRRQIVEMAAAGVRPCVSRQLRVSHGCVSKILNRFQETGSIRPGVIGGSKPR-VATPDIESRIEELKQSQPGIFSWIIRAKLI  |
| Dm PAIRED     | SGQGRVNVQLGGVFINGRPLPNNIRLIVEMAADGIRPCVSRQLRVSHGCVSKILNRYQETGSIRPGVIGGSKPR-IATPEIENRIEYKRSPPGMFSWEIREKLI    |
| Mm PAX4       | DGLSSVNVQLGGLFVNGRPLPLDTRQQIVQLAIRGMRPCDISRSLKVSNGCVSKILGRYYRTGVLEPKCIGGSKPR-LATPAVVARIAQLKDEYPALFAWEIQHQLC |
| Ce VAB-3A     | AGHTGVNVQLGGVFNVGRPLPDATRQRIVDLAHKGCRCPCDISRLQVSNCGCVSKILCRYYESGTIRPRAIGGSKPR-VATSDVVEKIEDYKRDQPSIFAWIIRDRL |
| Dm EYELESS    | KGHSGVNVQLGGVFVNGRPLPDSTRQKIVELAHSGARPCDISRIQVSNCGCVSKILGRYYETGSIRPRAIGGSKPR-VATAEVVSKIASQYKRECPSIFAWIIRDRL |
| Mm PAX6       | NSHSGVNVQLGGVFNVGRPLPDSTRQKIVELAHSGARPCDISRIQVSNCGCVSKILGRYYETGSIRPRAIGGSKPR-VATPEVVSIAQYKRECPSIFAWIIRDRL   |
| Dm TOY        | AGHSGINVQLGGVFNVGRPLPDSTRQKIVELAHSGARPCDISRIQVSNCGCVSKILGRYYETGSIKPRAIGGSKPR-VATTPVVKIADYKRECPSIFAWIIRDRL   |

C

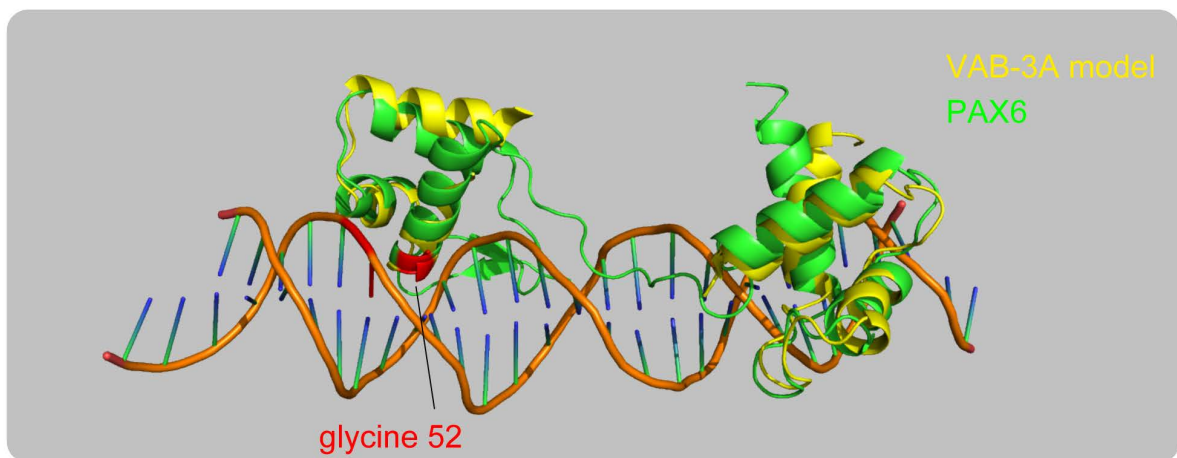

**Figure S2. wz25 affects a highly conserved residue in the VAB-3A Paired homology domain.**

A. Radial dendrogram showing relatedness of VAB-3A to Paired domain-containing proteins from mouse (*Mus musculus*) and fly (*Drosophila melanogaster*).

B. ClustalW alignment of Paired domain sequences showing the conservation of the glycine (G52) predicted to be affected by the *wz25* mutation.

C. Homology model of the VAB-3A Paired domain based on the crystal structure of mouse Pax6 bound to DNA determined by Xu *et al.* (1999). The residue mutated by *wz25* is likely part of a helix that mediates interactions with DNA. A homology model of VAB-3A structure was generated using the Phyre2 server (Kelley *et al.*, 2015) and visualized using MacPyMol (Schrodinger LLC).

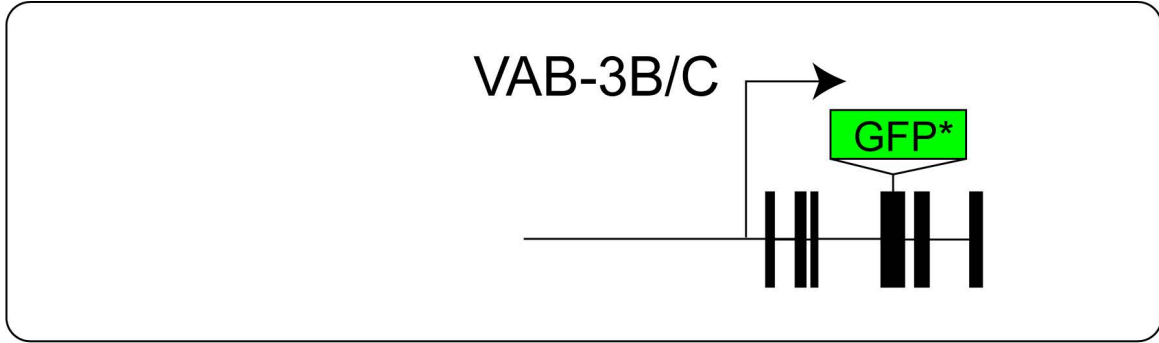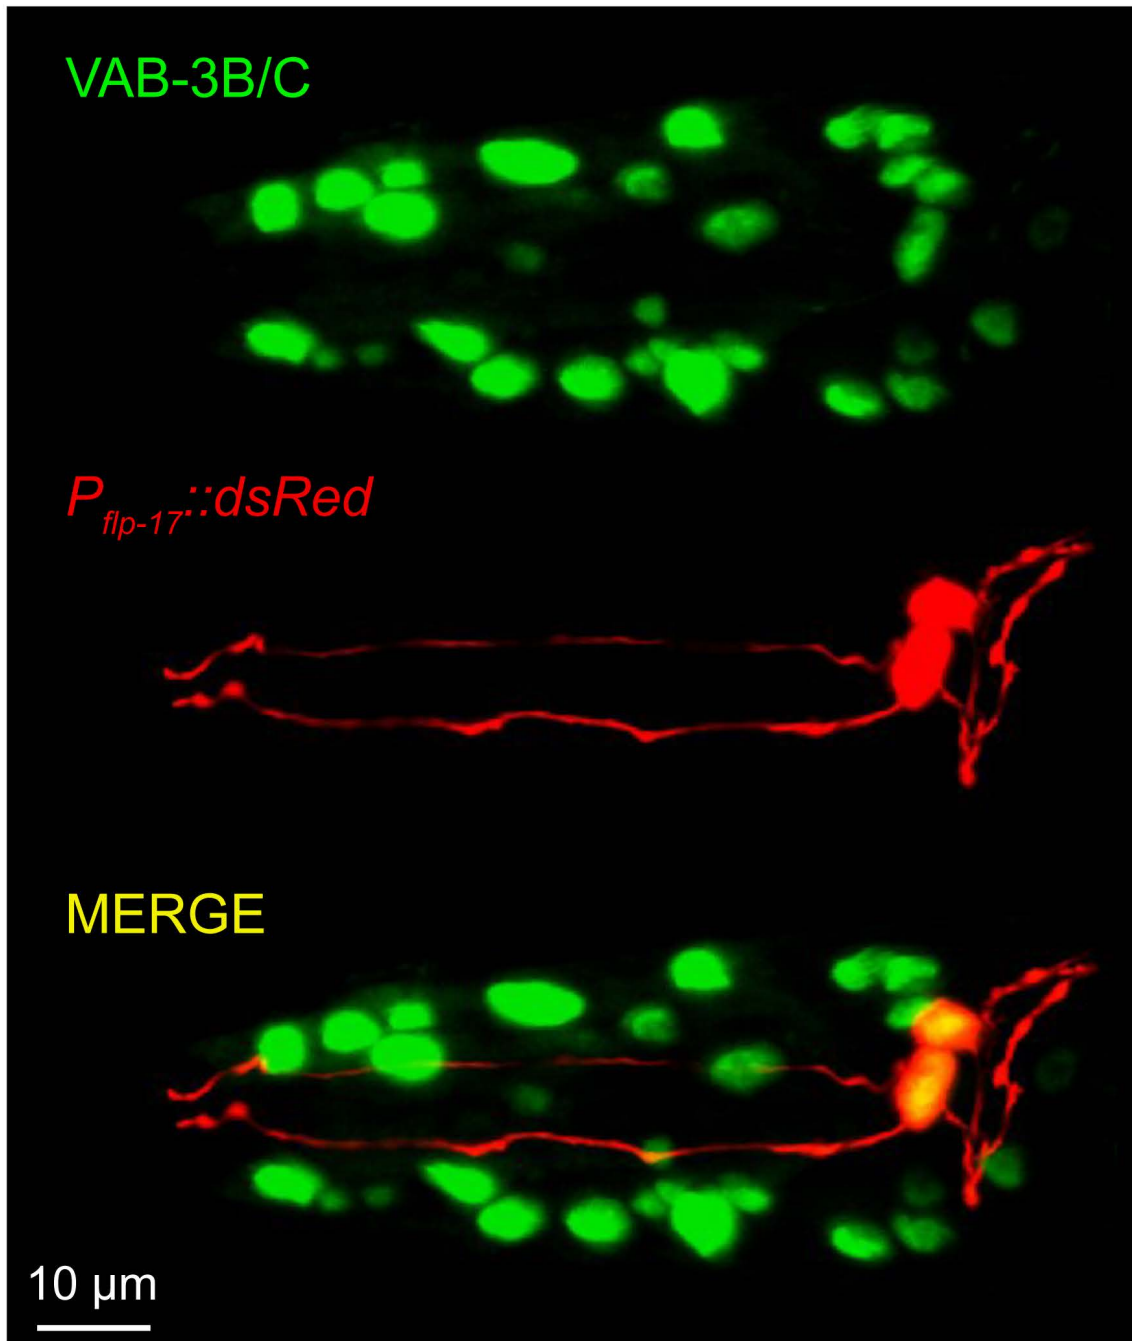

**Figure S3. The VAB-3 short isoforms are expressed in head cells including BAG.**  
Schematic of reporter for expression of short (VAB-3B/C) isoforms of *vab-3*. An adult hermaphrodite expressing a VAB-3B/C transcriptional reporter and  $P_{flp-17}::dsRed$ .

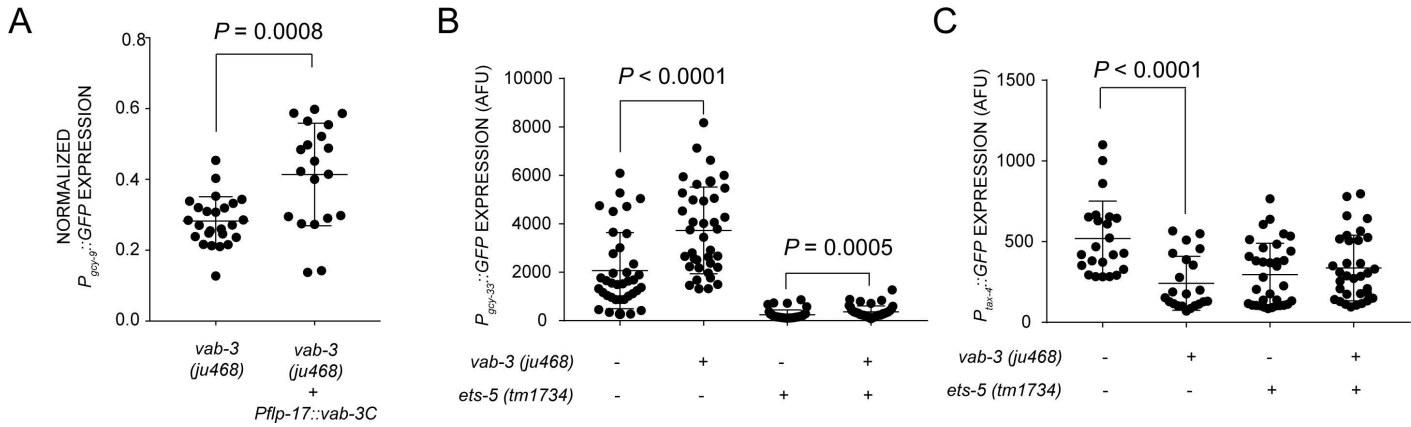

**Figure S4. A mutation affecting the short isoforms of VAB-3 has different effects on BAG-enriched genes.**

A. Levels of  $P_{gcy-9}::GFP$ -expression in BAG neurons of *vab-3* mutants in Arbitrary Fluorescence Units (AFU) normalized to the wild type average. BAG-specific expression of the short isoform in *ju468* partially rescues *gcy-9* expression.

B. Levels of  $P_{gcy-33}::GFP$ -expression in BAG neurons of *vab-3* mutants in Arbitrary Fluorescence Units (AFU). *ju468*, an allele affecting the short isoform, causes increased levels of the BAG-specific guanylate cyclase, and it also suppresses the decrease in  $P_{gcy-33}::GFP$  caused by *ets-5*.

C. Levels of  $P_{tax-4}::GFP$ -expression in BAG neurons of *vab-3* mutants. *ju468* causes decreased levels of the cyclic nucleotide-gated calcium channel subunit, yet no additive decrease in an *ets-5* mutant background.

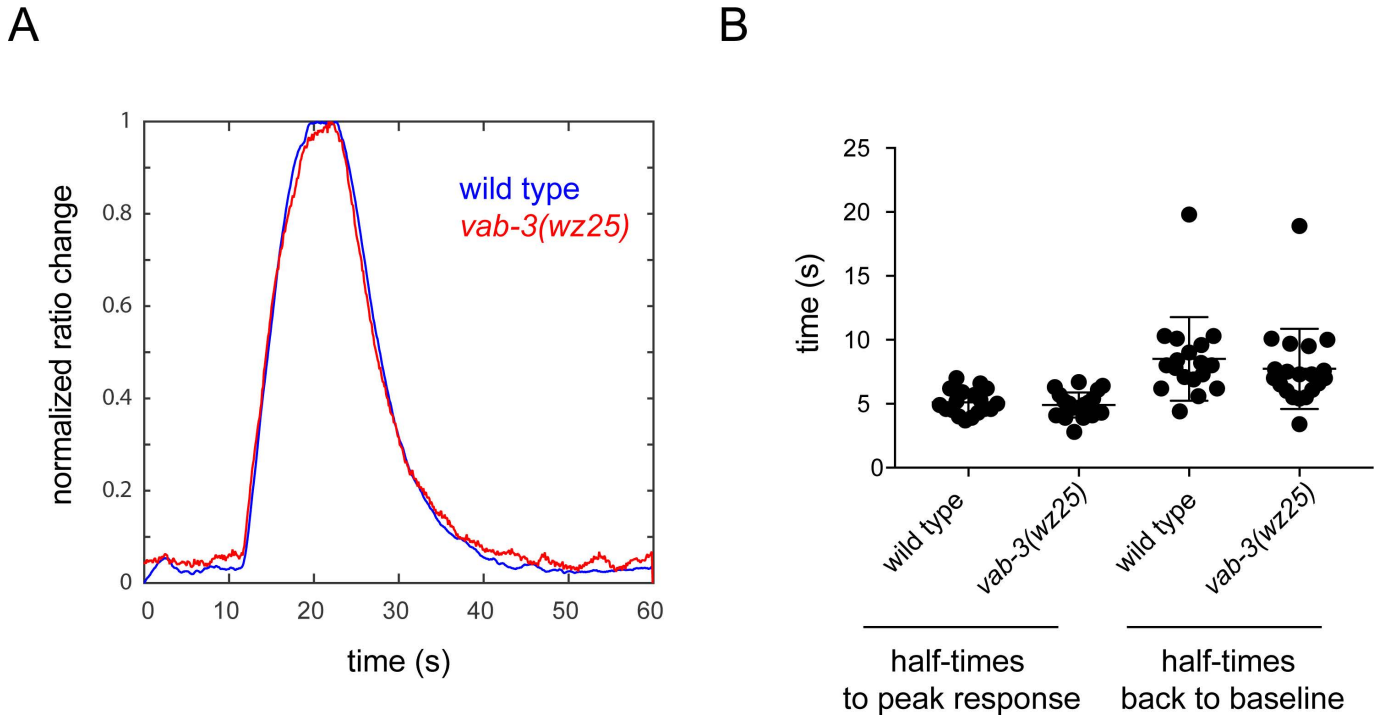

**Figure S5. Dynamics of BAG neuron calcium transients.**

A. The average calcium responses of wild-type and *wz25* BAG neurons scaled to unity. A 10 s pulse of 10% CO<sub>2</sub> was delivered at the 10-second mark.

B. Rise-times (half-times to peak after stimulus onset) and recovery times (half-times to baseline after stimulus is removed) of wild-type and *wz25* mutant BAG neurons stimulated with 10% CO<sub>2</sub>. Bars in scatterplots display mean ± SD.

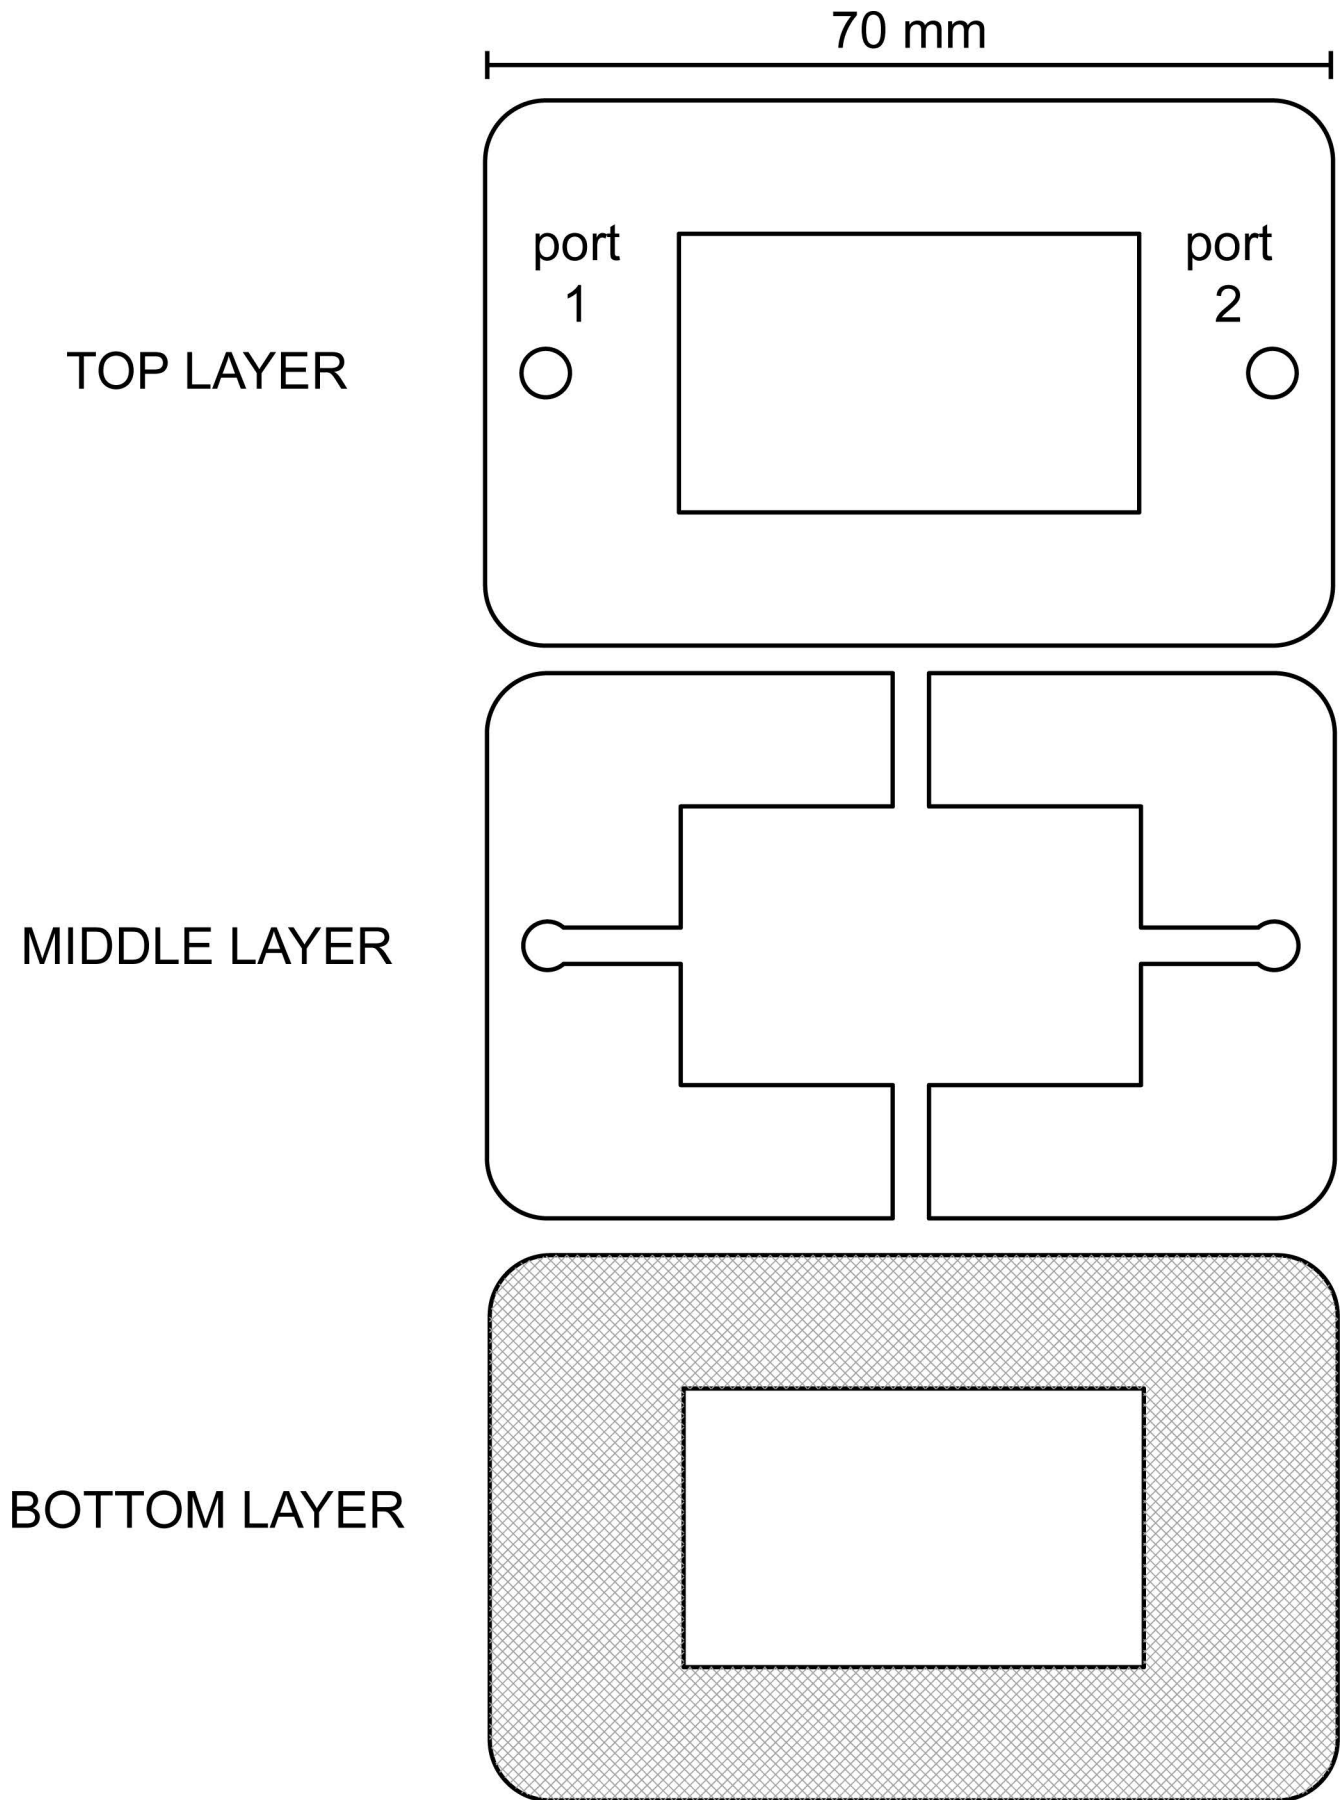



**Figure S6. Design and construction of chemotaxis chambers used in this study**

Chemotaxis chambers were constructed by adhering three layers that were laser-cut from 1/16" acrylic sheet plastic. The bottom layer was etched with a hatched pattern, shown in gray. This hatching generated a textured surface on the bottom of the chamber. After the top and middle layers were bonded, ports were tapped to received plastic barbed fittings to which plastic tubing was attached. The fully assembled chamber was covered with a rectangular coverglass adhered to the chamber with silicone grease. The textured bottom of the chamber was painted with glycerol to adhere it to the surface of NGM agar plates and to generate a barrier that confined worms within the chamber. Original CAD files are available upon request.

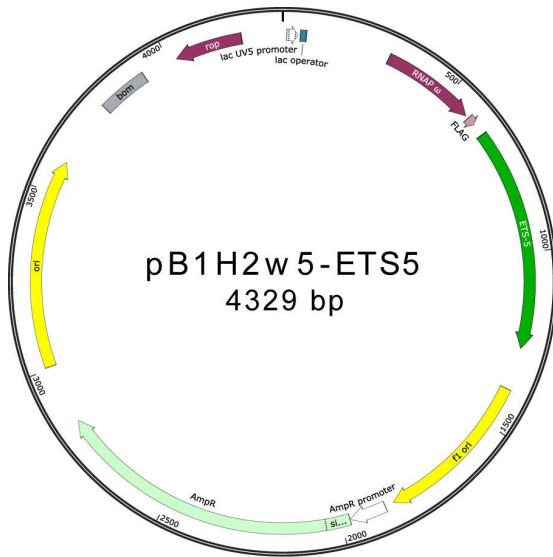

>ETS-5 B1H BAIT

```
MQYASALS RIPSSNSTSASKGPMIALSATGTGQIQ
LWQFLELLADAVNAHCIAWEGSNGEFKLVDPDEV
ARKWGERKSKPNMNYDKLSRALRYYYDKNIMTKV
QGKRYAYKDFDQGLAQACQSAILTNGGNPNGLDSS
TVHSLSPYTNQVLPIGVTSRLSTSMSSYHSILSSTS
STSSNQIIPPSTATYWSTPQSSLTYTGMPSY*
```

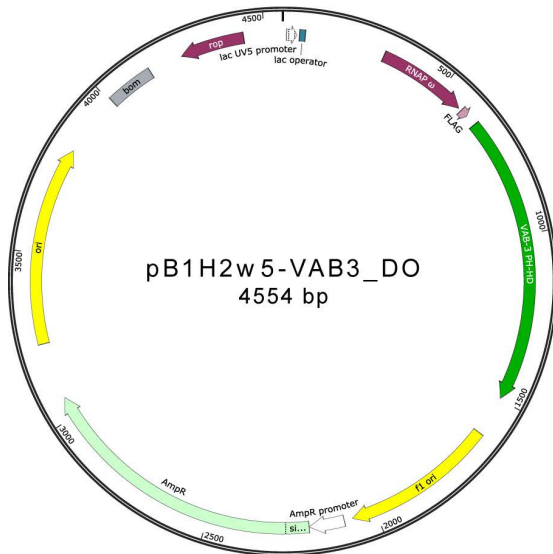

>VAB-3 B1H BAIT

```
TSDAGHTGVNQLGGVFVNGRPLPDATRQRIVDLA
HKGCRPCDISRLLQVSNCGVSKILCRYYESGTIRPR
AIGGSKPRVATSDVVEKIEDYKRDQPSIFAWERDK
LLADNICNNETIPSVSSINRVLRLNLAkkeQVTMQT
ELYDRIRIVDNFPYNSSWYGQWPIPMNGAVGLNPF
VPAPLIEPKTEGEFEKDEDQKPTEPEDDAAARMR
LKRKLQRNRTSFTQVQIESLEKEFERTHYPDV FAR
ERLAQKIQLPEARIQVWF SNRRAKWRREEKMRNK
RSS*
```

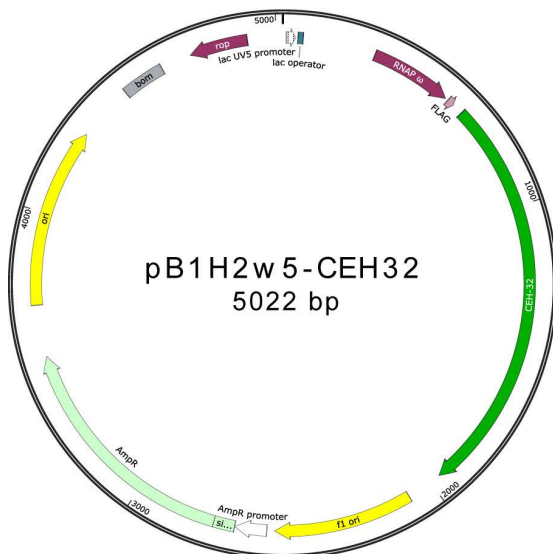

>CEH-32 B1H BAIT

```
MFTPEQFTKVMSQLGNFSQLGQMFQPGNVAMLQ
ALQANGASSTPSLFPAMPSPVPSLAAPSSPTTSLNT
ADQIVKTCEQLETDGDVDGLFRFMCTIPPQKTQEV
AGNEAFLRARALVCFHASHFRELYAILENNKFSPKY
HPKLQEMWHEAHYREQEKNRGKSLCAVDKYRVR
KKYMPRTIWDGEQKTHCFKERTSLLREWYLKD
PYPNPPKKKELANATGLTQMVGWFKNRRQRD
RAAAAKNKQNIIGVELKKTSSDMSDSDDDDFEDSMT
DSPSPIDEPKDLKSHIPKLSPTLLPKMATPFDMFA
AAANPLMMLNLPALYMQFHNFNTMRNPQIDEE
NSETTVEVEADIEPPKKRSKLSIDEILNIKSEVSPSQ
CSPCSNESLSPKRAVKTEEVKKEDEAAEEDSRSV
KSETSEDPKHSSPKSTTSQSE*
```

**Figure S7. Sequences of baits used for bacterial one-hybrid screens**

Schematics of plasmids used to express ETS-5, VAB-3, and CEH-32 for bacterial one-hybrid screening. The amino acid sequences of the baits encoded by each plasmid are shown to the right.
